# Supplementary material
Source: JCI journal article supplement (doi:10.1172/jci201842)
Supplement: sd3 [file 3]

## Supplemental material

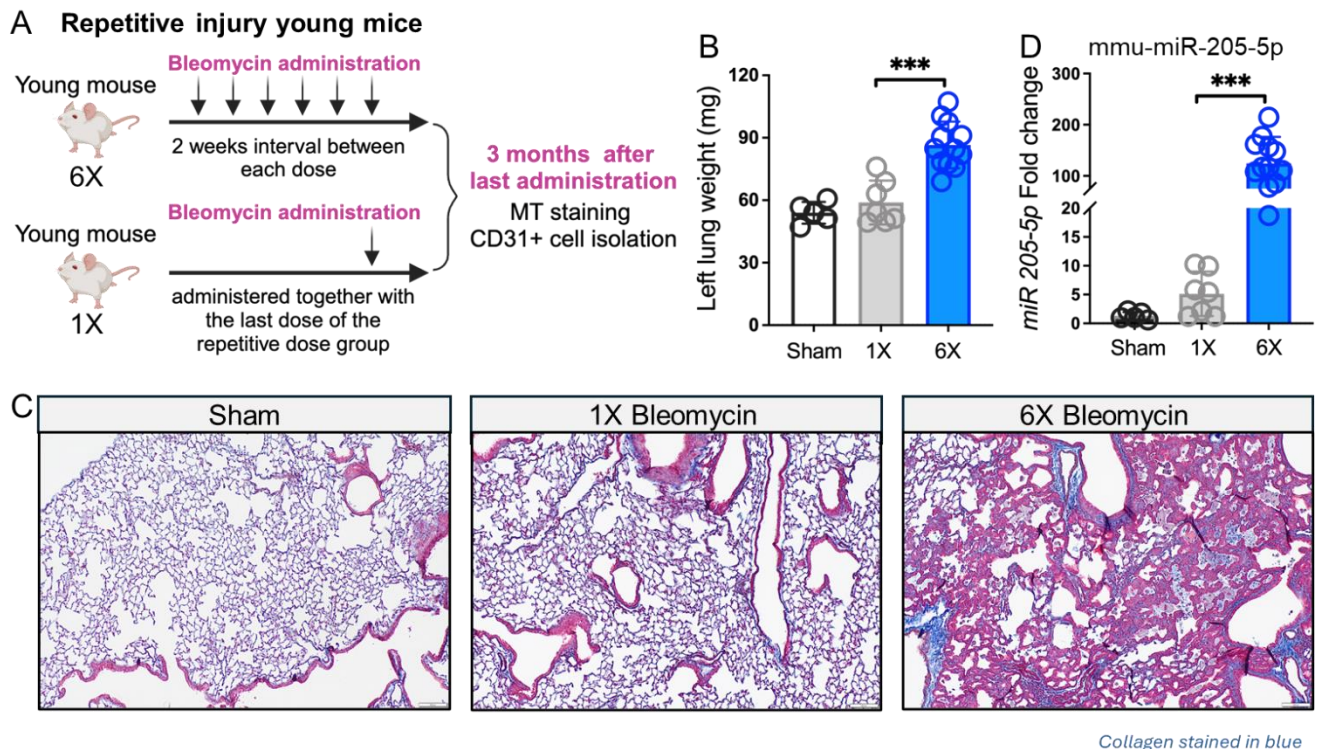

**Supplemental Figure 1. Lung endothelial miR-205-5p is upregulated in young mice with progressive fibrosis induced by repetitive bleomycin injury. A)** Schematics depicting the experimental plan for repetitive bleomycin (created with a licensed version of BioRender.com). Lungs were harvested 90 days after the 6<sup>th</sup> dose or after the single dose (to allow for complete resolution in single dosed mice). **B)** Lung weight is higher in 6X bleo mice compared to 1X bleo mice. **C)** Representative Masson's Trichrome staining (collagen stained in blue) showing increased collagen I deposition in 6X bleo mice compared to 1X bleo mice. Scale bar: 100 $\mu$ m. **D)** qPCR shows significant upregulation of miR-205-5p in isolated lung ECs from 6X bleo mice compared to lung ECs from 1X bleo mice. snU6 was used as normalization control. Data are expressed as mean and SD and each dot represents an individual mouse (Sham: n=5; 1X Bleo: n=7; 6X Bleo: n=12). p values were calculated using one-way analysis of variance (followed by Tukey's post hoc test). \*\*\*p<0.01.

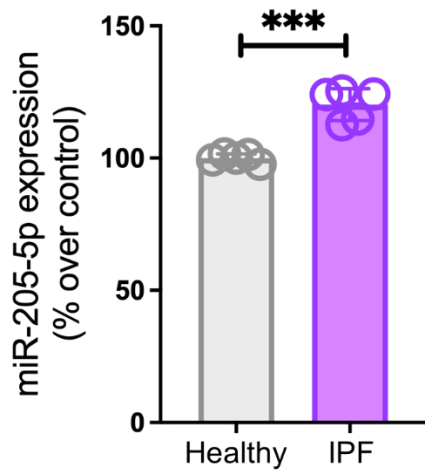

**Supplemental Figure 2. miR-205-5p expression is increased in IPF tissue.** Quantification of miR-205-5p in healthy and IPF tissue. Individual punctate signals (dots) were quantified using TrackMate in FIJI and counts were normalized to the area of the region of interest. Background signal was subtracted by measuring unstained areas and thresholds were set to minimize noise. Each dot is the average of 12-15 field of views. Values are summarized as mean and SD and  $p$  values were calculated using Student's t-test.

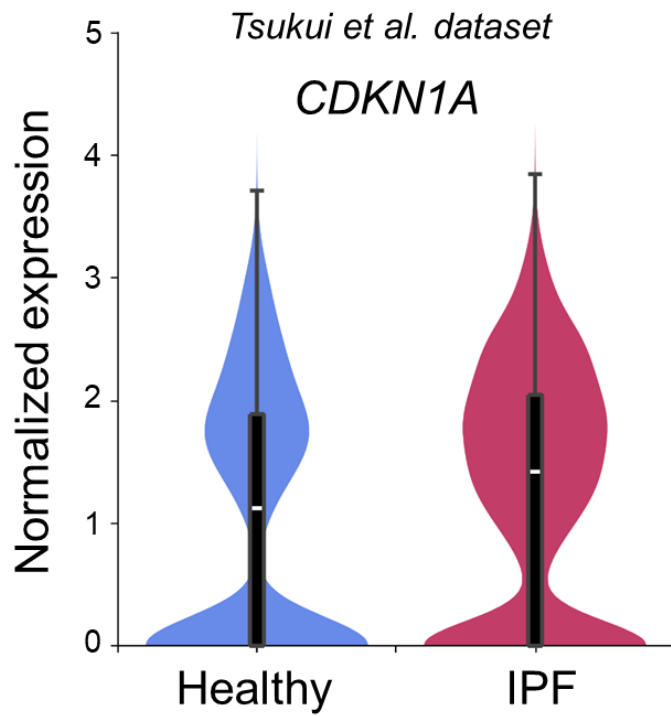

**Supplemental Figure 3. Expression of *CDKN1A* in lung ECs.** Violin plot of the expression of senescence marker *CDKN1A* in healthy and IPF CD31+ lung ECs (healthy, n= 1794 cells and IPF n=2830 cells). Values are summarized as mean and SD.

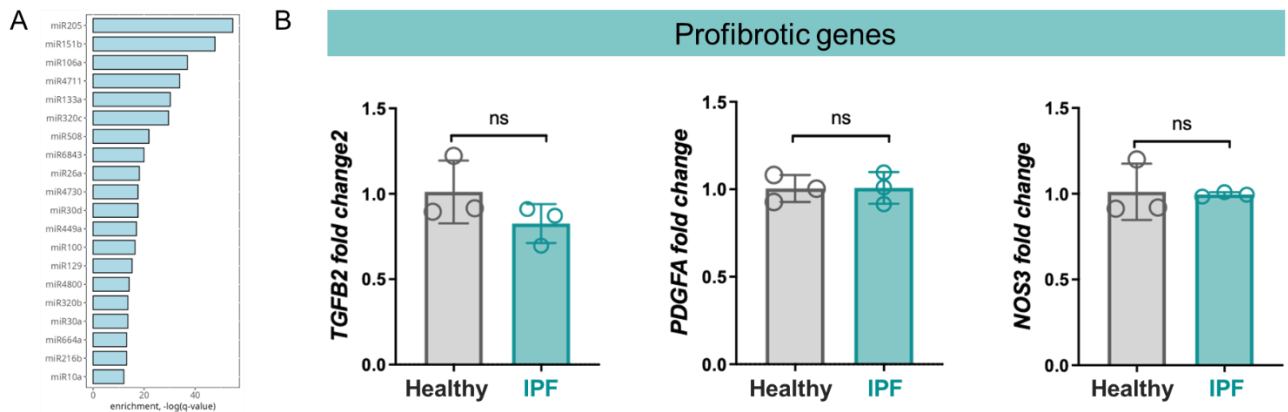

**Supplemental Figure 4. Expression of genes not significantly regulated by miR-205-5p in IPF lung ECs.** qPCR shows that transcript levels of *TGFB2*, *PDGFA* and *NOS3* are unchanged in IPF lung ECs upon inhibition of miR-205-5p. N=3 independent biological replicates. Data are expressed as mean and SD and p values were calculated using Student's t-test.

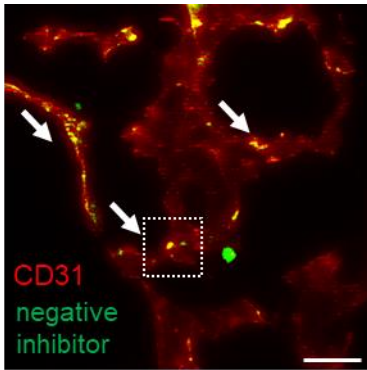

**Supplemental Figure 5. Colocalization of miR-205-5p in the mouse pulmonary vasculature.** A FAM-labelled miR-205-5p inhibitor (10 mg/Kg) was administered to mice via retro-orbital intravenous injection and lungs were harvested 2 days after the injection. Representative immunofluorescence images show FAM-labelled miR-205-5p inhibitor (green dots) and anti CD31 to identify the vasculature (red). Confocal microscopy reveals colocalization of FAM-labelled miR-205-5p inhibitor within the pulmonary vasculature. Scale bar: 50  $\mu$ m.

**Supplemental Table 1. List of all predicted target genes from target prediction analysis.**

*Uploaded as a separated .xlsx file*

## Confirmation of Publication and Licensing Rights - Open Access

May 10th, 2026

**Subscription Type:** *Individual - Academic*

**Agreement number:** *HJ29P8DW83*

**Publisher Name:** *JCI insight*

**Figure Title:** *Biorender Fig 7E*

**Citation to Use:** *Created in BioRender. Caporarello, N. (2026) <https://BioRender.com/scw1kca>*

To whom this may concern,

This document ("Confirmation") hereby confirms that Science Suite Inc. dba BioRender ("BioRender") has granted the following BioRender user: Nunzia Caporarello ("User") a BioRender Academic Publication License in accordance with BioRender's [Terms of Service](#) and [Academic License Terms](#) ("License Terms") to permit such User to do the following on the condition that all requirements in this Confirmation are met:

- 1) publish their Completed Graphics created in the BioRender Services containing both User Content and BioRender Content (as both are defined in the License Terms) in publications (journals, textbooks, websites, etc.); and
- 2) sublicense such Completed Graphics under "open access" publication sublicensing models such as CC-BY 4.0 and more restrictive models, so long as the conditions set forth herein are fully met.

Requirements of User:

- 1) All Completed Graphics to be published in any publication (journals, textbooks, websites, etc.) must be accompanied by the following citation either as a caption, footnote or reference for each figure that includes a Completed Graphic:  
"Created in BioRender. Caporarello, N. (2026) <https://BioRender.com/scw1kca> ".
- 2) All terms of the License Terms including all Prohibited Uses are fully complied with. E.g. For Academic License Users, no commercial uses (beyond publication in journals, textbooks or websites) are permitted without obtaining or switching to a BioRender Industry Plan.
- 3) A Reader (defined below) may request that the User allow their figure to be a public template for Readers to view, copy, and modify the figure. It is up to the User to determine what level of access to grant.

Open-Access Journal Readers:

Open-Access journal readers ("Reader") who wish to view and/or re-use a particular Completed Graphic in an Open-Access journal subject to CC-BY sublicensing may do so by clicking on the URL link in the applicable citation for the subject Completed Graphic.

The re-use/modification options below are available after the Reader requests the User to adapt their figure as a BioRender template and the User has granted such access.

- 1) **View-Only/Free Plan Use:** A Reader who wishes to only view the Completed Graphic may do so in the BioRender Services as either a BioRender Free Plan user or simply as a viewer. By becoming a BioRender Free Plan user, the Reader may view, modify and re-use the Completed Graphic as permitted under BioRender's [Basic License Terms](#) (e.g. personal use only, no publishing or commercial use permitted).
- 2) **Re-Use/Publish with No Modifications:** For any re-use and re-publication of a Completed Graphic with no modification(s) to the Completed Graphic made by the Reader, a Reader may do so by citing the original author using the citation noted above with the Completed Graphic. The Reader must also comply with the underlying License Terms which apply to the Completed Graphic as noted above (e.g. no commercial use for Academic License).
- 3) **Re-Use/Publish with Modifications:** For any re-use and re-publication of a Completed Graphic with a modification(s) made by the Reader, the Reader may do so by becoming a BioRender user themselves under either an Academic or Industry Plan, citing the original author using the citation noted above with the Completed Graphic and complying with the applicable License Terms.

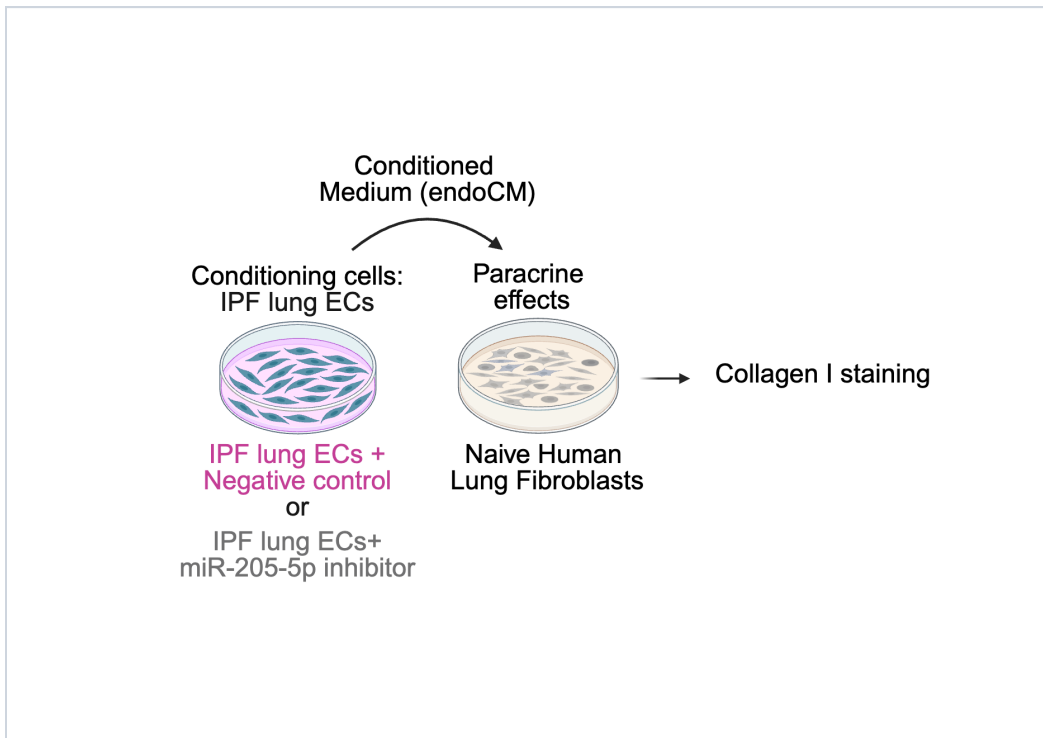

For any questions regarding this document, or other questions about publishing with BioRender, please refer to our [BioRender Publication Guide](#), or contact BioRender Support at [support@biorender.com](mailto:support@biorender.com).

## Confirmation of Publication and Licensing Rights - Open Access

May 10th, 2026

**Subscription Type:** *Individual - Academic*  
**Agreement number:** *GA29P8DM0D*  
**Publisher Name:** *JCI insight*

**Figure Title:** *Biorender Fig 5A*

**Citation to Use:** *Created in BioRender. Caporarello, N. (2026) <https://BioRender.com/scw1kca>*

To whom this may concern,

This document ("Confirmation") hereby confirms that Science Suite Inc. dba BioRender ("BioRender") has granted the following BioRender user: Nunzia Caporarello ("User") a BioRender Academic Publication License in accordance with BioRender's [Terms of Service](#) and [Academic License Terms](#) ("License Terms") to permit such User to do the following on the condition that all requirements in this Confirmation are met:

- 1) publish their Completed Graphics created in the BioRender Services containing both User Content and BioRender Content (as both are defined in the License Terms) in publications (journals, textbooks, websites, etc.); and
- 2) sublicense such Completed Graphics under "open access" publication sublicensing models such as CC-BY 4.0 and more restrictive models, so long as the conditions set forth herein are fully met.

Requirements of User:

- 1) All Completed Graphics to be published in any publication (journals, textbooks, websites, etc.) must be accompanied by the following citation either as a caption, footnote or reference for each figure that includes a Completed Graphic:  
"Created in BioRender. Caporarello, N. (2026) <https://BioRender.com/scw1kca> ".
- 2) All terms of the License Terms including all Prohibited Uses are fully complied with. E.g. For Academic License Users, no commercial uses (beyond publication in journals, textbooks or websites) are permitted without obtaining or switching to a BioRender Industry Plan.
- 3) A Reader (defined below) may request that the User allow their figure to be a public template for Readers to view, copy, and modify the figure. It is up to the User to determine what level of access to grant.

Open-Access Journal Readers:

Open-Access journal readers ("Reader") who wish to view and/or re-use a particular Completed Graphic in an Open-Access journal subject to CC-BY sublicensing may do so by clicking on the URL link in the applicable citation for the subject Completed Graphic.

The re-use/modification options below are available after the Reader requests the User to adapt their figure as a BioRender template and the User has granted such access.

- 1) **View-Only/Free Plan Use:** A Reader who wishes to only view the Completed Graphic may do so in the BioRender Services as either a BioRender Free Plan user or simply as a viewer. By becoming a BioRender Free Plan user, the Reader may view, modify and re-use the Completed Graphic as permitted under BioRender's [Basic License Terms](#) (e.g. personal use only, no publishing or commercial use permitted).
- 2) **Re-Use/Publish with No Modifications:** For any re-use and re-publication of a Completed Graphic with no modification(s) to the Completed Graphic made by the Reader, a Reader may do so by citing the original author using the citation noted above with the Completed Graphic. The Reader must also comply with the underlying License Terms which apply to the Completed Graphic as noted above (e.g. no commercial use for Academic License).
- 3) **Re-Use/Publish with Modifications:** For any re-use and re-publication of a Completed Graphic with a modification(s) made by the Reader, the Reader may do so by becoming a BioRender user themselves under either an Academic or Industry Plan, citing the original author using the citation noted above with the Completed Graphic and complying with the applicable License Terms.

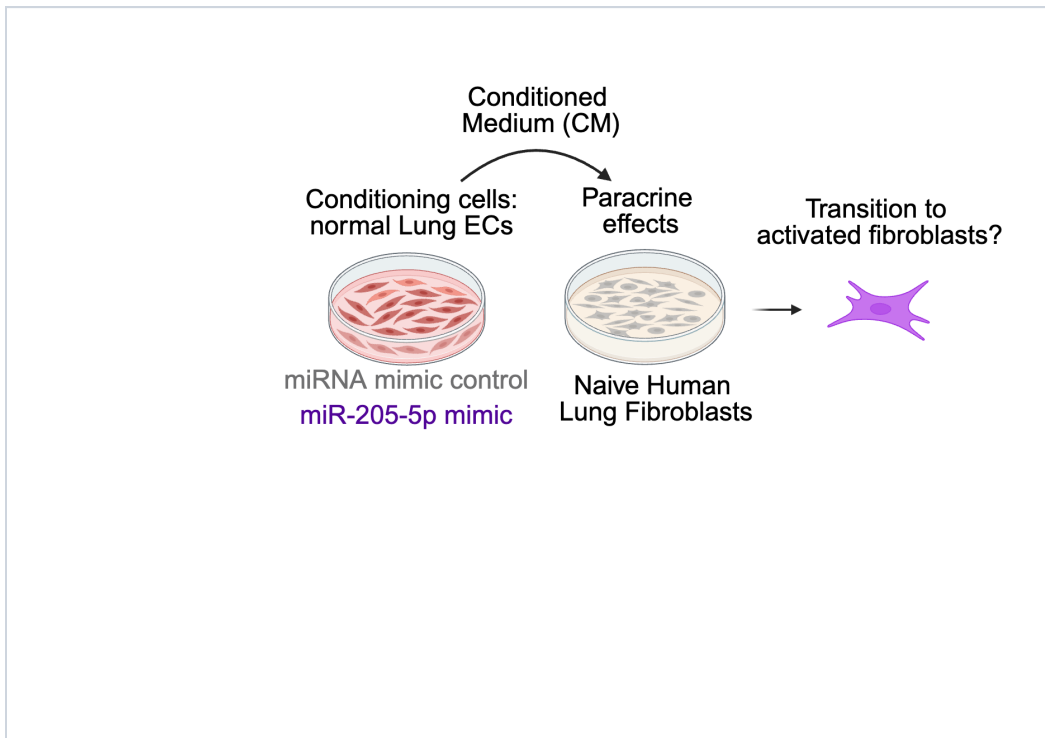

For any questions regarding this document, or other questions about publishing with BioRender, please refer to our [BioRender Publication Guide](#), or contact BioRender Support at [support@biorender.com](mailto:support@biorender.com).

## Confirmation of Publication and Licensing Rights - Open Access

May 10th, 2026

**Subscription Type:** *Individual - Academic*  
**Agreement number:** *JB29P8CAEC*  
**Publisher Name:** *JCI insight*

**Figure Title:** *Biorender Suppl 3A*

**Citation to Use:** *Created in BioRender. Caporarello, N. (2026) [https://  
BioRender.com/1onca8j](https://BioRender.com/1onca8j)*

To whom this may concern,

This document ("Confirmation") hereby confirms that Science Suite Inc. dba BioRender ("BioRender") has granted the following BioRender user: Nunzia Caporarello ("User") a BioRender Academic Publication License in accordance with BioRender's [Terms of Service](#) and [Academic License Terms](#) ("License Terms") to permit such User to do the following on the condition that all requirements in this Confirmation are met:

- 1) publish their Completed Graphics created in the BioRender Services containing both User Content and BioRender Content (as both are defined in the License Terms) in publications (journals, textbooks, websites, etc.); and
- 2) sublicense such Completed Graphics under "open access" publication sublicensing models such as CC-BY 4.0 and more restrictive models, so long as the conditions set forth herein are fully met.

Requirements of User:

- 1) All Completed Graphics to be published in any publication (journals, textbooks, websites, etc.) must be accompanied by the following citation either as a caption, footnote or reference for each figure that includes a Completed Graphic:  
"Created in BioRender. Caporarello, N. (2026) <https://BioRender.com/1onca8j>".
- 2) All terms of the License Terms including all Prohibited Uses are fully complied with. E.g. For Academic License Users, no commercial uses (beyond publication in journals, textbooks or websites) are permitted without obtaining or switching to a BioRender Industry Plan.
- 3) A Reader (defined below) may request that the User allow their figure to be a public template for Readers to view, copy, and modify the figure. It is up to the User to determine what level of access to grant.

Open-Access Journal Readers:

Open-Access journal readers ("Reader") who wish to view and/or re-use a particular Completed Graphic in an Open-Access journal subject to CC-BY sublicensing may do so by clicking on the URL link in the applicable citation for the subject Completed Graphic.

The re-use/modification options below are available after the Reader requests the User to adapt their figure as a BioRender template and the User has granted such access.

- 1) View-Only/Free Plan Use: A Reader who wishes to only view the Completed Graphic may do so in the BioRender Services as either a BioRender Free Plan user or simply as a viewer. By becoming a BioRender Free Plan user, the Reader may view, modify and re-use the Completed Graphic as permitted under BioRender's [Basic License Terms](#) (e.g. personal use only, no publishing or commercial use permitted).
- 2) Re-Use/Publish with No Modifications: For any re-use and re-publication of a Completed Graphic with no modification(s) to the Completed Graphic made by the Reader, a Reader may do so by citing the original author using the citation noted above with the Completed Graphic. The Reader must also comply with the underlying License Terms which apply to the Completed Graphic as noted above (e.g. no commercial use for Academic License).
- 3) Re-Use/Publish with Modifications: For any re-use and re-publication of a Completed Graphic with a modification(s) made by the Reader, the Reader may do so by becoming a BioRender user themselves under either an Academic or Industry Plan, citing the original author using the citation noted above with the Completed Graphic and complying with the applicable License Terms.

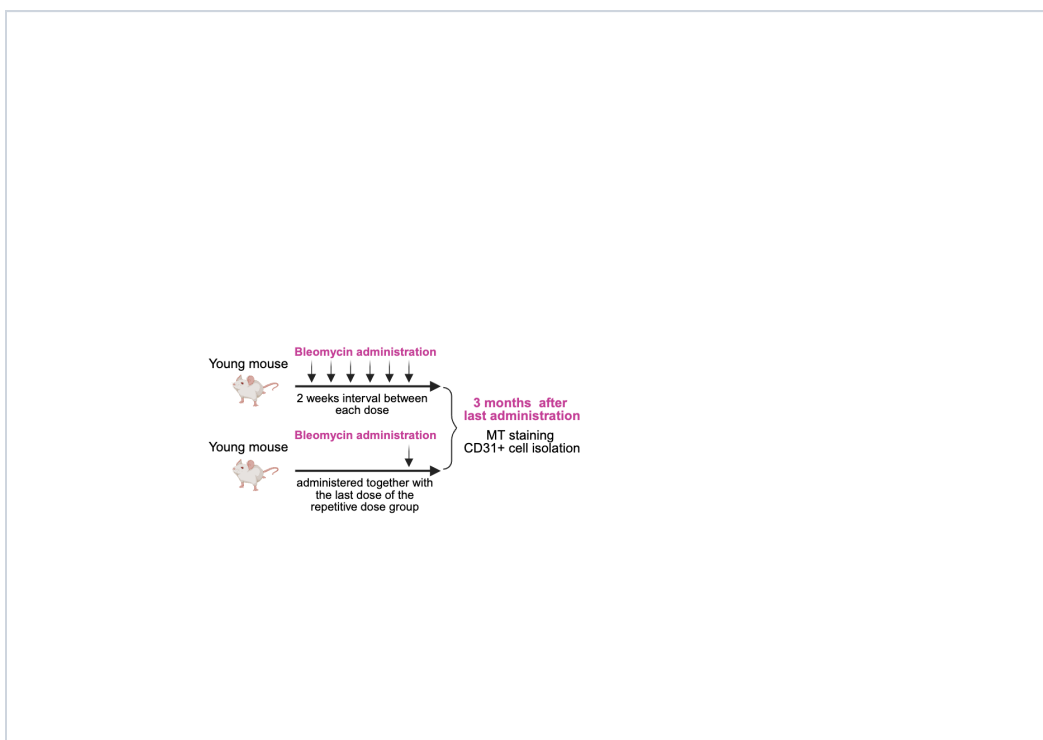

For any questions regarding this document, or other questions about publishing with BioRender, please refer to our [BioRender Publication Guide](#), or contact BioRender Support at [support@biorender.com](mailto:support@biorender.com).

## Confirmation of Publication and Licensing Rights - Open Access

May 10th, 2026

**Subscription Type:** *Individual - Academic*  
**Agreement number:** *YQ29P8BH8P*  
**Publisher Name:** *JCI insight*

**Figure Title:** *Biorender Fig 1A*

**Citation to Use:** *Created in BioRender. Caporarello, N. (2026) <https://BioRender.com/6yv5yqk>*

To whom this may concern,

This document ("Confirmation") hereby confirms that Science Suite Inc. dba BioRender ("BioRender") has granted the following BioRender user: Nunzia Caporarello ("User") a BioRender Academic Publication License in accordance with BioRender's [Terms of Service](#) and [Academic License Terms](#) ("License Terms") to permit such User to do the following on the condition that all requirements in this Confirmation are met:

- 1) publish their Completed Graphics created in the BioRender Services containing both User Content and BioRender Content (as both are defined in the License Terms) in publications (journals, textbooks, websites, etc.); and
- 2) sublicense such Completed Graphics under "open access" publication sublicensing models such as CC-BY 4.0 and more restrictive models, so long as the conditions set forth herein are fully met.

Requirements of User:

- 1) All Completed Graphics to be published in any publication (journals, textbooks, websites, etc.) must be accompanied by the following citation either as a caption, footnote or reference for each figure that includes a Completed Graphic:  
"Created in BioRender. Caporarello, N. (2026) <https://BioRender.com/6yv5yqk>".
- 2) All terms of the License Terms including all Prohibited Uses are fully complied with. E.g. For Academic License Users, no commercial uses (beyond publication in journals, textbooks or websites) are permitted without obtaining or switching to a BioRender Industry Plan.
- 3) A Reader (defined below) may request that the User allow their figure to be a public template for Readers to view, copy, and modify the figure. It is up to the User to determine what level of access to grant.

Open-Access Journal Readers:

Open-Access journal readers ("Reader") who wish to view and/or re-use a particular Completed Graphic in an Open-Access journal subject to CC-BY sublicensing may do so by clicking on the URL link in the applicable citation for the subject Completed Graphic.

The re-use/modification options below are available after the Reader requests the User to adapt their figure as a BioRender template and the User has granted such access.

- 1) **View-Only/Free Plan Use:** A Reader who wishes to only view the Completed Graphic may do so in the BioRender Services as either a BioRender Free Plan user or simply as a viewer. By becoming a BioRender Free Plan user, the Reader may view, modify and re-use the Completed Graphic as permitted under BioRender's [Basic License Terms](#) (e.g. personal use only, no publishing or commercial use permitted).
- 2) **Re-Use/Publish with No Modifications:** For any re-use and re-publication of a Completed Graphic with no modification(s) to the Completed Graphic made by the Reader, a Reader may do so by citing the original author using the citation noted above with the Completed Graphic. The Reader must also comply with the underlying License Terms which apply to the Completed Graphic as noted above (e.g. no commercial use for Academic License).
- 3) **Re-Use/Publish with Modifications:** For any re-use and re-publication of a Completed Graphic with a modification(s) made by the Reader, the Reader may do so by becoming a BioRender user themselves under either an Academic or Industry Plan, citing the original author using the citation noted above with the Completed Graphic and complying with the applicable License Terms.

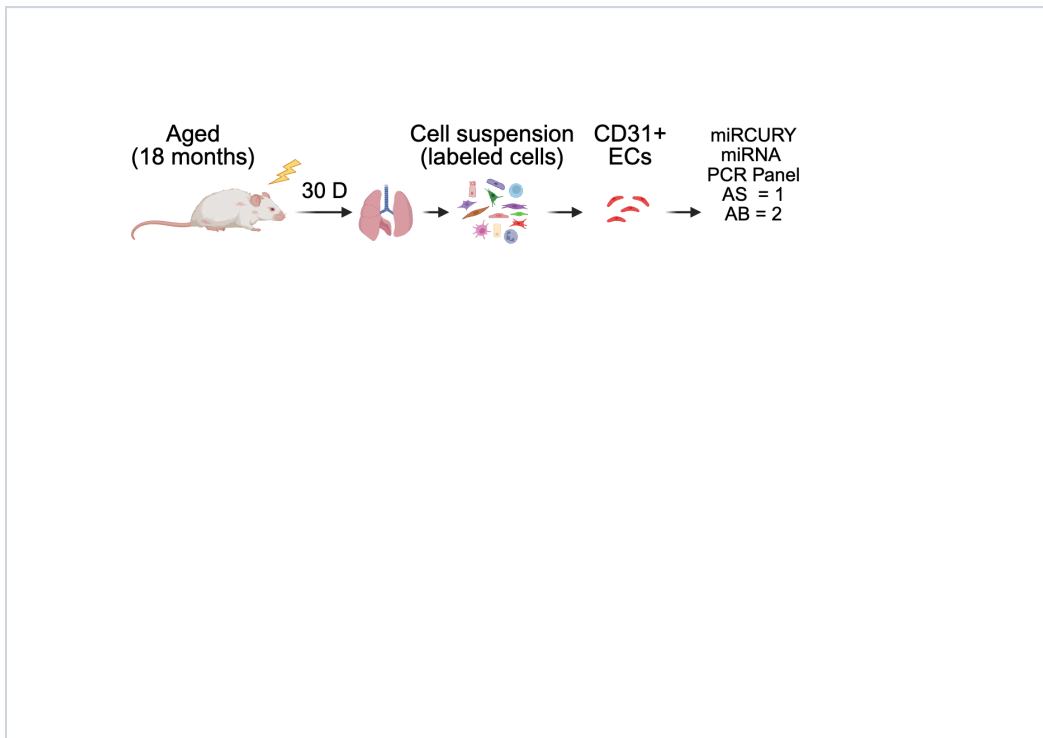

For any questions regarding this document, or other questions about publishing with BioRender, please refer to our [BioRender Publication Guide](#), or contact BioRender Support at [support@biorender.com](mailto:support@biorender.com).

## Confirmation of Publication and Licensing Rights - Open Access

May 10th, 2026

**Subscription Type:** *Individual - Academic*  
**Agreement number:** *XQ29P8B3GC*  
**Publisher Name:** *JCI insight*

**Figure Title:** *Biorender Fig 3A*

**Citation to Use:** *Created in BioRender. Caporarello, N. (2026) <https://BioRender.com/4it9afa>*

To whom this may concern,

This document ("Confirmation") hereby confirms that Science Suite Inc. dba BioRender ("BioRender") has granted the following BioRender user: Nunzia Caporarello ("User") a BioRender Academic Publication License in accordance with BioRender's [Terms of Service](#) and [Academic License Terms](#) ("License Terms") to permit such User to do the following on the condition that all requirements in this Confirmation are met:

- 1) publish their Completed Graphics created in the BioRender Services containing both User Content and BioRender Content (as both are defined in the License Terms) in publications (journals, textbooks, websites, etc.); and
- 2) sublicense such Completed Graphics under "open access" publication sublicensing models such as CC-BY 4.0 and more restrictive models, so long as the conditions set forth herein are fully met.

Requirements of User:

- 1) All Completed Graphics to be published in any publication (journals, textbooks, websites, etc.) must be accompanied by the following citation either as a caption, footnote or reference for each figure that includes a Completed Graphic:  
"Created in BioRender. Caporarello, N. (2026) <https://BioRender.com/4it9afa>".
- 2) All terms of the License Terms including all Prohibited Uses are fully complied with. E.g. For Academic License Users, no commercial uses (beyond publication in journals, textbooks or websites) are permitted without obtaining or switching to a BioRender Industry Plan.
- 3) A Reader (defined below) may request that the User allow their figure to be a public template for Readers to view, copy, and modify the figure. It is up to the User to determine what level of access to grant.

Open-Access Journal Readers:

Open-Access journal readers ("Reader") who wish to view and/or re-use a particular Completed Graphic in an Open-Access journal subject to CC-BY sublicensing may do so by clicking on the URL link in the applicable citation for the subject Completed Graphic.

The re-use/modification options below are available after the Reader requests the User to adapt their figure as a BioRender template and the User has granted such access.

- 1) View-Only/Free Plan Use: A Reader who wishes to only view the Completed Graphic may do so in the BioRender Services as either a BioRender Free Plan user or simply as a viewer. By becoming a BioRender Free Plan user, the Reader may view, modify and re-use the Completed Graphic as permitted under BioRender's [Basic License Terms](#) (e.g. personal use only, no publishing or commercial use permitted).
- 2) Re-Use/Publish with No Modifications: For any re-use and re-publication of a Completed Graphic with no modification(s) to the Completed Graphic made by the Reader, a Reader may do so by citing the original author using the citation noted above with the Completed Graphic. The Reader must also comply with the underlying License Terms which apply to the Completed Graphic as noted above (e.g. no commercial use for Academic License).
- 3) Re-Use/Publish with Modifications: For any re-use and re-publication of a Completed Graphic with a modification(s) made by the Reader, the Reader may do so by becoming a BioRender user themselves under either an Academic or Industry Plan, citing the original author using the citation noted above with the Completed Graphic and complying with the applicable License Terms.

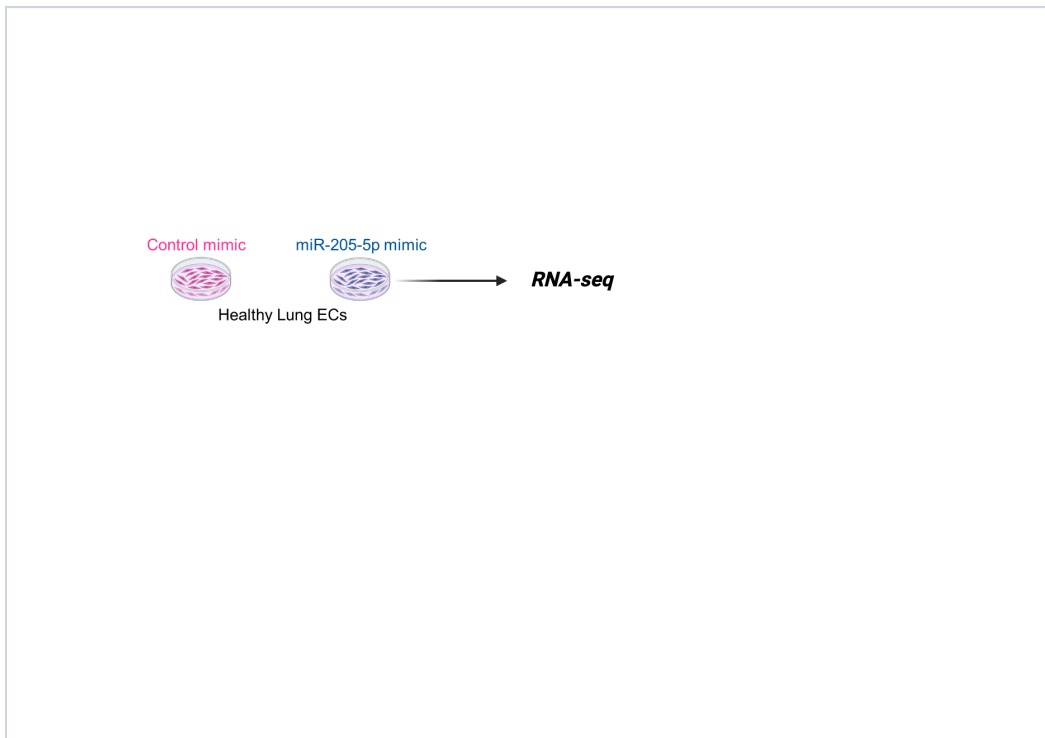

For any questions regarding this document, or other questions about publishing with BioRender, please refer to our [BioRender Publication Guide](#), or contact BioRender Support at [support@biorender.com](mailto:support@biorender.com).

## Confirmation of Publication and Licensing Rights - Open Access

May 10th, 2026

**Subscription Type:** *Individual - Academic*  
**Agreement number:** *MG29P8AQLX*  
**Publisher Name:** *JCI insight*

**Figure Title:** *Biorender Fig 6A*

**Citation to Use:** *Created in BioRender. Caporarello, N. (2026) <https://BioRender.com/apy6umg>*

To whom this may concern,

This document ("Confirmation") hereby confirms that Science Suite Inc. dba BioRender ("BioRender") has granted the following BioRender user: Nunzia Caporarello ("User") a BioRender Academic Publication License in accordance with BioRender's [Terms of Service](#) and [Academic License Terms](#) ("License Terms") to permit such User to do the following on the condition that all requirements in this Confirmation are met:

- 1) publish their Completed Graphics created in the BioRender Services containing both User Content and BioRender Content (as both are defined in the License Terms) in publications (journals, textbooks, websites, etc.); and
- 2) sublicense such Completed Graphics under "open access" publication sublicensing models such as CC-BY 4.0 and more restrictive models, so long as the conditions set forth herein are fully met.

Requirements of User:

- 1) All Completed Graphics to be published in any publication (journals, textbooks, websites, etc.) must be accompanied by the following citation either as a caption, footnote or reference for each figure that includes a Completed Graphic:  
"Created in BioRender. Caporarello, N. (2026) <https://BioRender.com/apy6umg>".
- 2) All terms of the License Terms including all Prohibited Uses are fully complied with. E.g. For Academic License Users, no commercial uses (beyond publication in journals, textbooks or websites) are permitted without obtaining or switching to a BioRender Industry Plan.
- 3) A Reader (defined below) may request that the User allow their figure to be a public template for Readers to view, copy, and modify the figure. It is up to the User to determine what level of access to grant.

Open-Access Journal Readers:

Open-Access journal readers ("Reader") who wish to view and/or re-use a particular Completed Graphic in an Open-Access journal subject to CC-BY sublicensing may do so by clicking on the URL link in the applicable citation for the subject Completed Graphic.

The re-use/modification options below are available after the Reader requests the User to adapt their figure as a BioRender template and the User has granted such access.

- 1) **View-Only/Free Plan Use:** A Reader who wishes to only view the Completed Graphic may do so in the BioRender Services as either a BioRender Free Plan user or simply as a viewer. By becoming a BioRender Free Plan user, the Reader may view, modify and re-use the Completed Graphic as permitted under BioRender's [Basic License Terms](#) (e.g. personal use only, no publishing or commercial use permitted).
- 2) **Re-Use/Publish with No Modifications:** For any re-use and re-publication of a Completed Graphic with no modification(s) to the Completed Graphic made by the Reader, a Reader may do so by citing the original author using the citation noted above with the Completed Graphic. The Reader must also comply with the underlying License Terms which apply to the Completed Graphic as noted above (e.g. no commercial use for Academic License).
- 3) **Re-Use/Publish with Modifications:** For any re-use and re-publication of a Completed Graphic with a modification(s) made by the Reader, the Reader may do so by becoming a BioRender user themselves under either an Academic or Industry Plan, citing the original author using the citation noted above with the Completed Graphic and complying with the applicable License Terms.

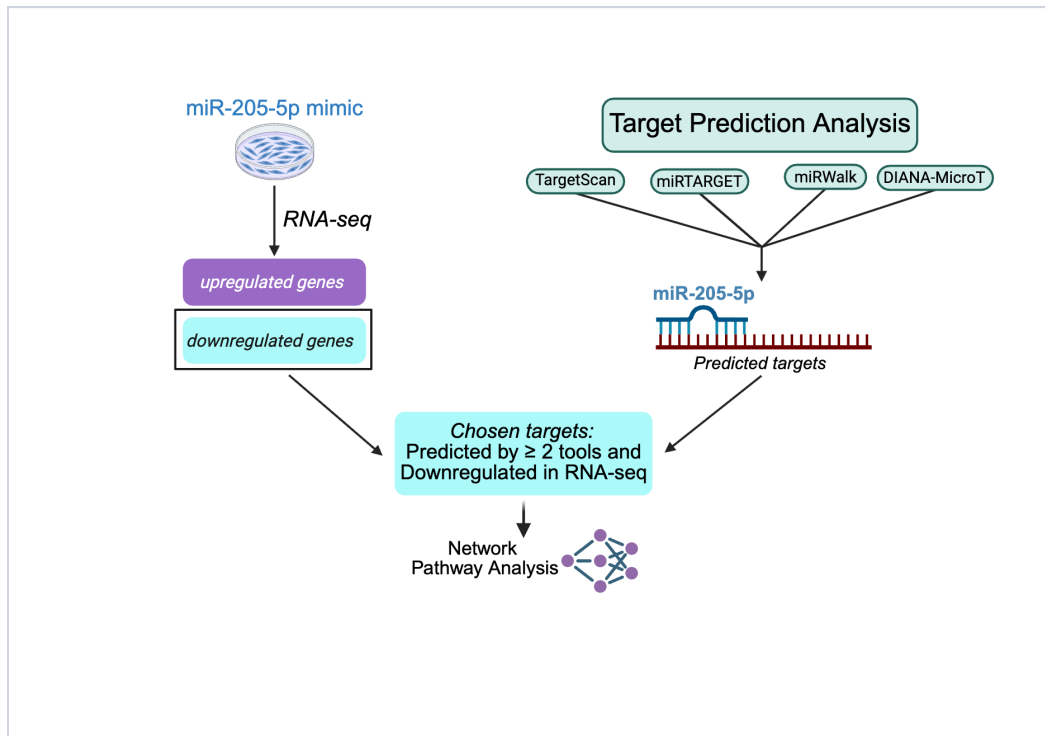

For any questions regarding this document, or other questions about publishing with BioRender, please refer to our [BioRender Publication Guide](#), or contact BioRender Support at [support@biorender.com](mailto:support@biorender.com).

## Confirmation of Publication and Licensing Rights - Open Access

May 10th, 2026

**Subscription Type:** *Individual - Academic*  
**Agreement number:** *XD29P8IQ3D*  
**Publisher Name:** *JCI insight*

**Figure Title:** *Biorender Fig 8A*

**Citation to Use:** *Created in BioRender. Caporarello, N. (2026) <https://BioRender.com/bw3alrn>*

To whom this may concern,

This document ("Confirmation") hereby confirms that Science Suite Inc. dba BioRender ("BioRender") has granted the following BioRender user: Nunzia Caporarello ("User") a BioRender Academic Publication License in accordance with BioRender's [Terms of Service](#) and [Academic License Terms](#) ("License Terms") to permit such User to do the following on the condition that all requirements in this Confirmation are met:

- 1) publish their Completed Graphics created in the BioRender Services containing both User Content and BioRender Content (as both are defined in the License Terms) in publications (journals, textbooks, websites, etc.); and
- 2) sublicense such Completed Graphics under "open access" publication sublicensing models such as CC-BY 4.0 and more restrictive models, so long as the conditions set forth herein are fully met.

Requirements of User:

- 1) All Completed Graphics to be published in any publication (journals, textbooks, websites, etc.) must be accompanied by the following citation either as a caption, footnote or reference for each figure that includes a Completed Graphic:  
"Created in BioRender. Caporarello, N. (2026) <https://BioRender.com/bw3alrn>".
- 2) All terms of the License Terms including all Prohibited Uses are fully complied with. E.g. For Academic License Users, no commercial uses (beyond publication in journals, textbooks or websites) are permitted without obtaining or switching to a BioRender Industry Plan.
- 3) A Reader (defined below) may request that the User allow their figure to be a public template for Readers to view, copy, and modify the figure. It is up to the User to determine what level of access to grant.

Open-Access Journal Readers:

Open-Access journal readers ("Reader") who wish to view and/or re-use a particular Completed Graphic in an Open-Access journal subject to CC-BY sublicensing may do so by clicking on the URL link in the applicable citation for the subject Completed Graphic.

The re-use/modification options below are available after the Reader requests the User to adapt their figure as a BioRender template and the User has granted such access.

- 1) View-Only/Free Plan Use: A Reader who wishes to only view the Completed Graphic may do so in the BioRender Services as either a BioRender Free Plan user or simply as a viewer. By becoming a BioRender Free Plan user, the Reader may view, modify and re-use the Completed Graphic as permitted under BioRender's [Basic License Terms](#) (e.g. personal use only, no publishing or commercial use permitted).
- 2) Re-Use/Publish with No Modifications: For any re-use and re-publication of a Completed Graphic with no modification(s) to the Completed Graphic made by the Reader, a Reader may do so by citing the original author using the citation noted above with the Completed Graphic. The Reader must also comply with the underlying License Terms which apply to the Completed Graphic as noted above (e.g. no commercial use for Academic License).
- 3) Re-Use/Publish with Modifications: For any re-use and re-publication of a Completed Graphic with a modification(s) made by the Reader, the Reader may do so by becoming a BioRender user themselves under either an Academic or Industry Plan, citing the original author using the citation noted above with the Completed Graphic and complying with the applicable License Terms.

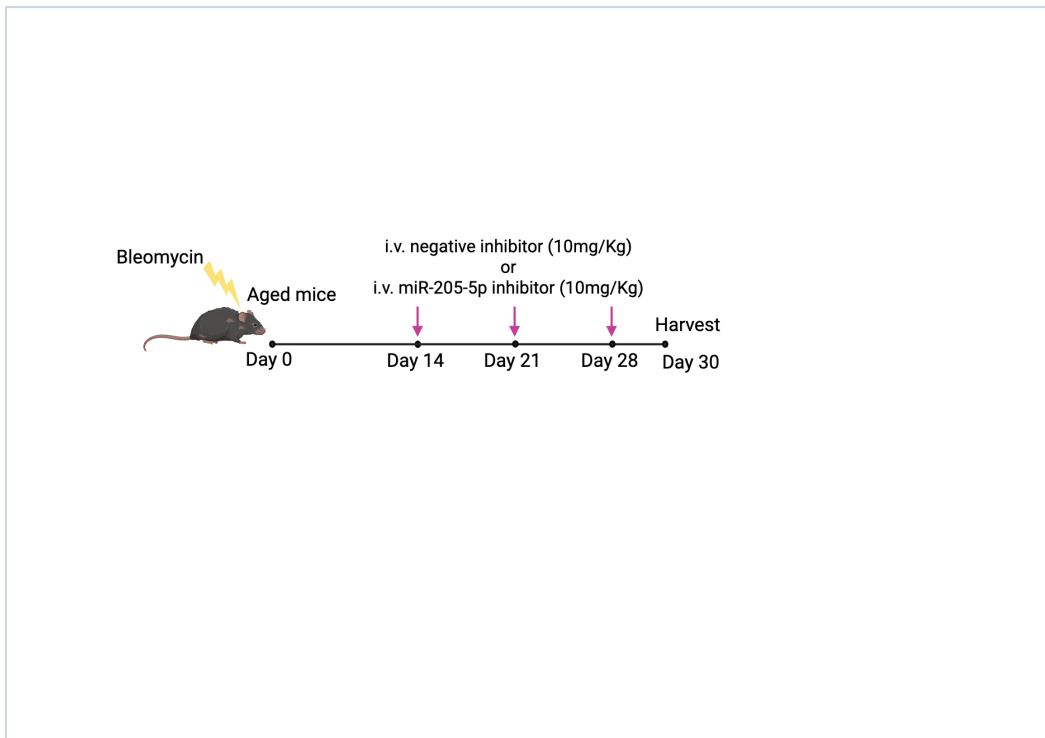

For any questions regarding this document, or other questions about publishing with BioRender, please refer to our [BioRender Publication Guide](#), or contact BioRender Support at [support@biorender.com](mailto:support@biorender.com).

## Confirmation of Publication and Licensing Rights - Open Access

May 10th, 2026

**Subscription Type:** *Individual - Academic*  
**Agreement number:** *MO29P8G89U*  
**Publisher Name:** *JCI insight*

**Figure Title:** *Biorender Fig 2A and D*

**Citation to Use:** *Created in BioRender. Caporarello, N. (2026) <https://BioRender.com/z57k322>*

To whom this may concern,

This document ("Confirmation") hereby confirms that Science Suite Inc. dba BioRender ("BioRender") has granted the following BioRender user: Nunzia Caporarello ("User") a BioRender Academic Publication License in accordance with BioRender's [Terms of Service](#) and [Academic License Terms](#) ("License Terms") to permit such User to do the following on the condition that all requirements in this Confirmation are met:

- 1) publish their Completed Graphics created in the BioRender Services containing both User Content and BioRender Content (as both are defined in the License Terms) in publications (journals, textbooks, websites, etc.); and
- 2) sublicense such Completed Graphics under "open access" publication sublicensing models such as CC-BY 4.0 and more restrictive models, so long as the conditions set forth herein are fully met.

Requirements of User:

- 1) All Completed Graphics to be published in any publication (journals, textbooks, websites, etc.) must be accompanied by the following citation either as a caption, footnote or reference for each figure that includes a Completed Graphic:  
"Created in BioRender. Caporarello, N. (2026) <https://BioRender.com/z57k322> ".
- 2) All terms of the License Terms including all Prohibited Uses are fully complied with. E.g. For Academic License Users, no commercial uses (beyond publication in journals, textbooks or websites) are permitted without obtaining or switching to a BioRender Industry Plan.
- 3) A Reader (defined below) may request that the User allow their figure to be a public template for Readers to view, copy, and modify the figure. It is up to the User to determine what level of access to grant.

Open-Access Journal Readers:

Open-Access journal readers ("Reader") who wish to view and/or re-use a particular Completed Graphic in an Open-Access journal subject to CC-BY sublicensing may do so by clicking on the URL link in the applicable citation for the subject Completed Graphic.

The re-use/modification options below are available after the Reader requests the User to adapt their figure as a BioRender template and the User has granted such access.

- 1) **View-Only/Free Plan Use:** A Reader who wishes to only view the Completed Graphic may do so in the BioRender Services as either a BioRender Free Plan user or simply as a viewer. By becoming a BioRender Free Plan user, the Reader may view, modify and re-use the Completed Graphic as permitted under BioRender's [Basic License Terms](#) (e.g. personal use only, no publishing or commercial use permitted).
- 2) **Re-Use/Publish with No Modifications:** For any re-use and re-publication of a Completed Graphic with no modification(s) to the Completed Graphic made by the Reader, a Reader may do so by citing the original author using the citation noted above with the Completed Graphic. The Reader must also comply with the underlying License Terms which apply to the Completed Graphic as noted above (e.g. no commercial use for Academic License).
- 3) **Re-Use/Publish with Modifications:** For any re-use and re-publication of a Completed Graphic with a modification(s) made by the Reader, the Reader may do so by becoming a BioRender user themselves under either an Academic or Industry Plan, citing the original author using the citation noted above with the Completed Graphic and complying with the applicable License Terms.

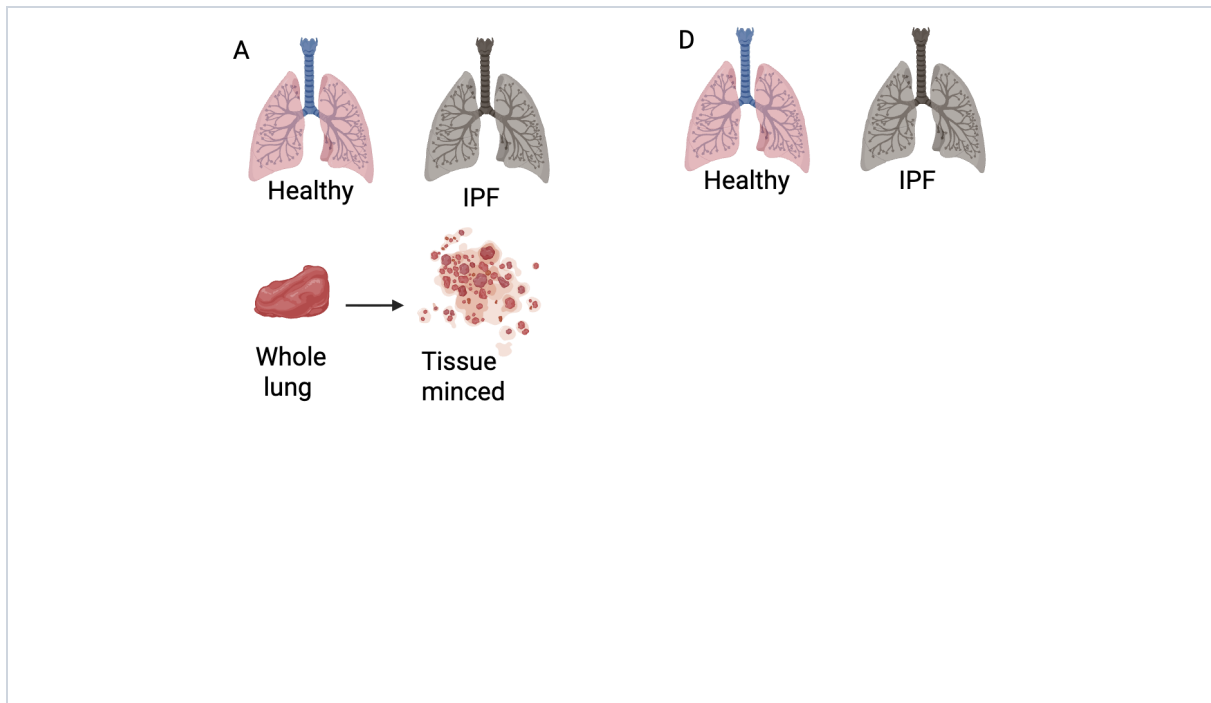

For any questions regarding this document, or other questions about publishing with BioRender, please refer to our [BioRender Publication Guide](#), or contact BioRender Support at [support@biorender.com](mailto:support@biorender.com).
